# Supplementary material for: Degradable polyurethane with poly(2-ethyl-2-oxazoline) brushes for protein resistance
Source: Royal Society of Chemistry journal article supplement (doi:10.1039/c6ra13663j), 2016-01-01
Supplement: c6ra13663j1.pdf [file c6ra13663j1.pdf]

## Supporting Information

For

### **Degradable Polyurethane with Poly(2-ethyl-2-oxazoline) Brushes for Protein Resistance**

Jinxian Yang,<sup>a</sup> Lianwei Li,<sup>a</sup> Chunfeng Ma,<sup>b</sup> Xiaodong Ye<sup>\*a</sup>

*a) Hefei National Laboratory for Physical Sciences at the Microscale, Department of Chemical Physics, University of Science and Technology of China, Hefei, Anhui 230026, China;*

*b) Faculty of Materials Science and Engineering, South China University of Technology, Guangzhou 510640, China*

*\*To whom correspondence should be addressed: [xdye@ustc.edu.cn](mailto:xdye@ustc.edu.cn)*

Table S1. GPC results of PEtOx(OH)<sub>2</sub>-1K and PU-g-PEtOx1K

| Samples                    | $M_n$ (g/mol)      | $M_w$ (g/mol)      | PDI  |
|----------------------------|--------------------|--------------------|------|
| PEtOx(OH) <sub>2</sub> -1K | $0.98 \times 10^3$ | $1.17 \times 10^3$ | 1.20 |
| PU                         | $5.59 \times 10^4$ | $1.15 \times 10^5$ | 2.05 |
| PU-g-PEtOx1K-0.5           | $3.06 \times 10^4$ | $3.06 \times 10^4$ | 1.94 |
| PU-g-PEtOx1K-0.7           | $3.49 \times 10^4$ | $6.28 \times 10^4$ | 1.80 |
| PU-g-PEtOx1K-0.9           | $4.27 \times 10^4$ | $8.57 \times 10^4$ | 2.01 |
| PU-g-PEtOx1K-1.0           | $6.26 \times 10^4$ | $1.31 \times 10^5$ | 2.10 |

Table S2. GPC results of PEtOx(OH)<sub>2</sub>-2K and PU-g-PEtOx2K

| Samples                    | $M_n$ (g/mol)      | $M_w$ (g/mol)      | PDI  |
|----------------------------|--------------------|--------------------|------|
| PEtOx(OH) <sub>2</sub> -2K | $2.02 \times 10^3$ | $2.27 \times 10^3$ | 1.12 |
| PU                         | $5.59 \times 10^4$ | $1.15 \times 10^5$ | 2.05 |
| PU-g-PEtOx2K-0.5           | $4.56 \times 10^4$ | $8.03 \times 10^4$ | 1.76 |
| PU-g-PEtOx2K-0.7           | $2.50 \times 10^4$ | $3.95 \times 10^4$ | 1.58 |
| PU-g-PEtOx2K-0.9           | $1.65 \times 10^4$ | $3.06 \times 10^4$ | 1.86 |
| PU-g-PEtOx2K-1.0           | $1.53 \times 10^4$ | $2.71 \times 10^4$ | 1.77 |

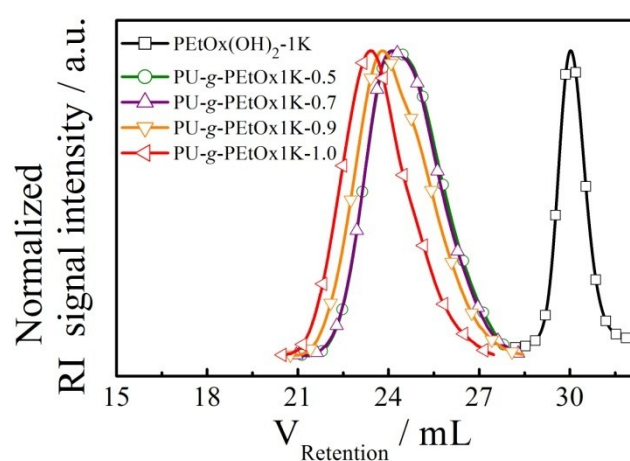

Figure S1. GPC traces from RI detector of PEtOx(OH)<sub>2</sub>-1K and PU-g-PEtOx1K with various graft densities of PEtOx(OH)<sub>2</sub>-1K.

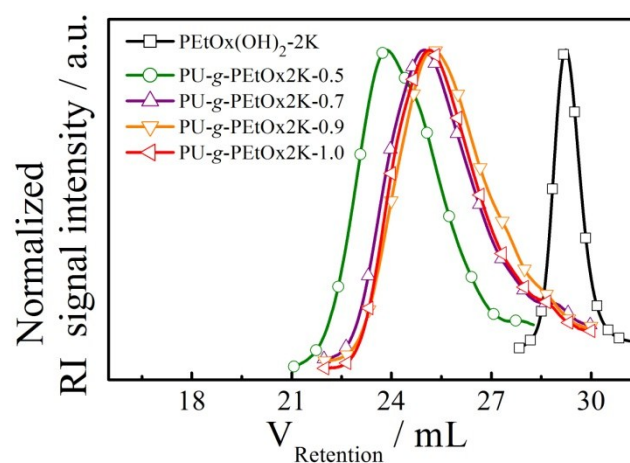

Figure S2. GPC traces from RI detector of PEtOx(OH)<sub>2</sub>-2K and PU-g-PEtOx2K with various graft densities of PEtOx(OH)<sub>2</sub>-2K.

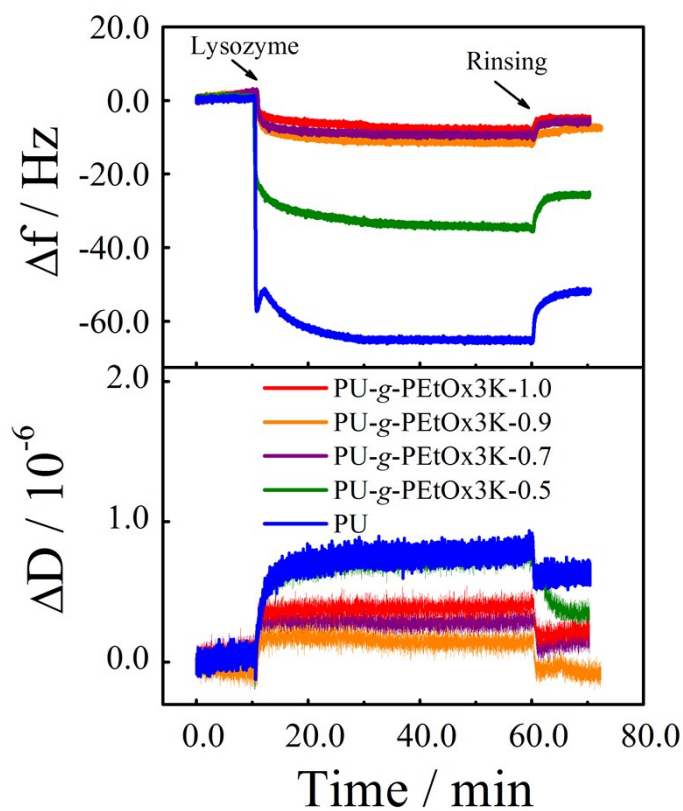

Figure S3. Time dependence of frequency shift ( $\Delta f$ ) and dissipation shift ( $\Delta D$ ) for the adsorption of lysozyme on PU-g-PEtOx3K surfaces with various graft densities of PEtOx(OH)<sub>2</sub>-3K at 25 °C.

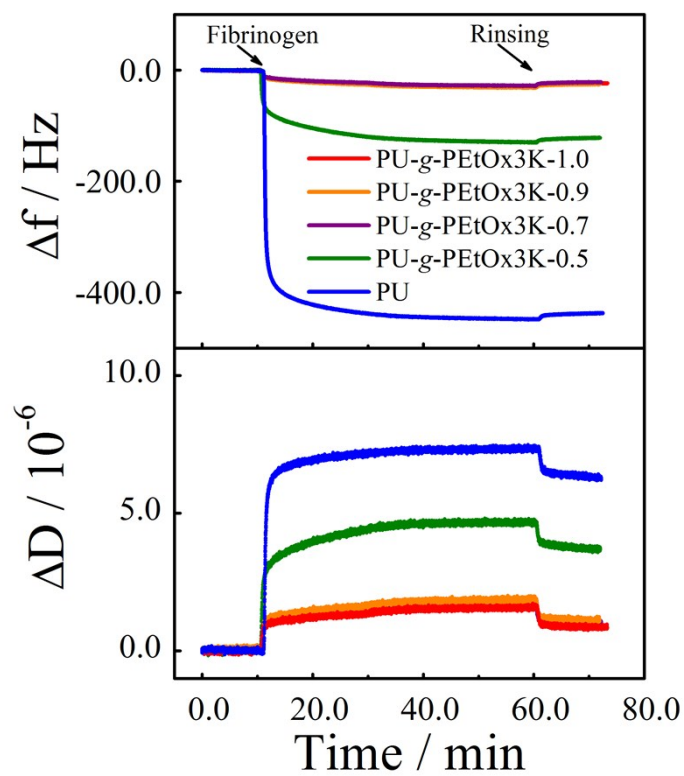

Figure S4. Time dependence of frequency shift ( $\Delta f$ ) and dissipation shift ( $\Delta D$ ) for the adsorption of fibrinogen on PU-g-PEtOx3K surfaces with various graft densities of PEtOx(OH)<sub>2</sub>-3K at 25 °C.

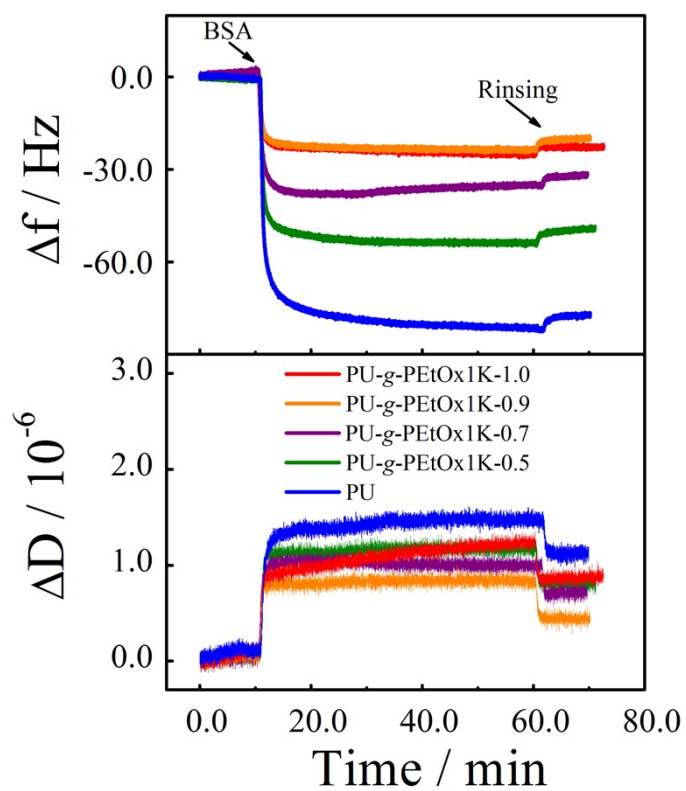

Figure S5. Time dependence of frequency shift ( $\Delta f$ ) and dissipation shift ( $\Delta D$ ) for the adsorption of BSA on PU-g-PEtOx1K surfaces with various graft densities of PEtOx(OH)<sub>2</sub>-1K at 25 °C.

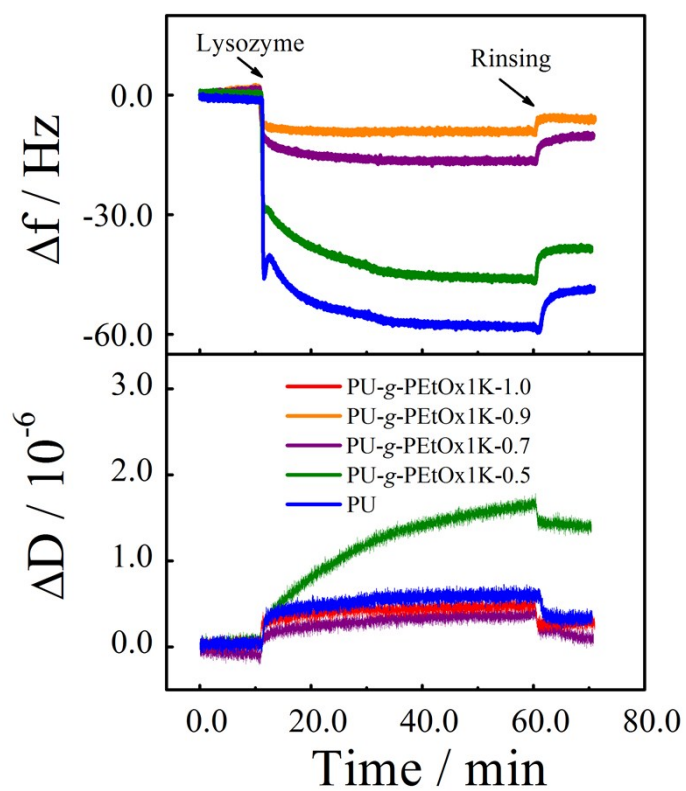

Figure S6. Time dependence of frequency shift ( $\Delta f$ ) and dissipation shift ( $\Delta D$ ) for the adsorption of lysozyme on PU-g-PEtOx1K surfaces with various graft densities of PEtOx(OH)<sub>2</sub>-1K at 25 °C.

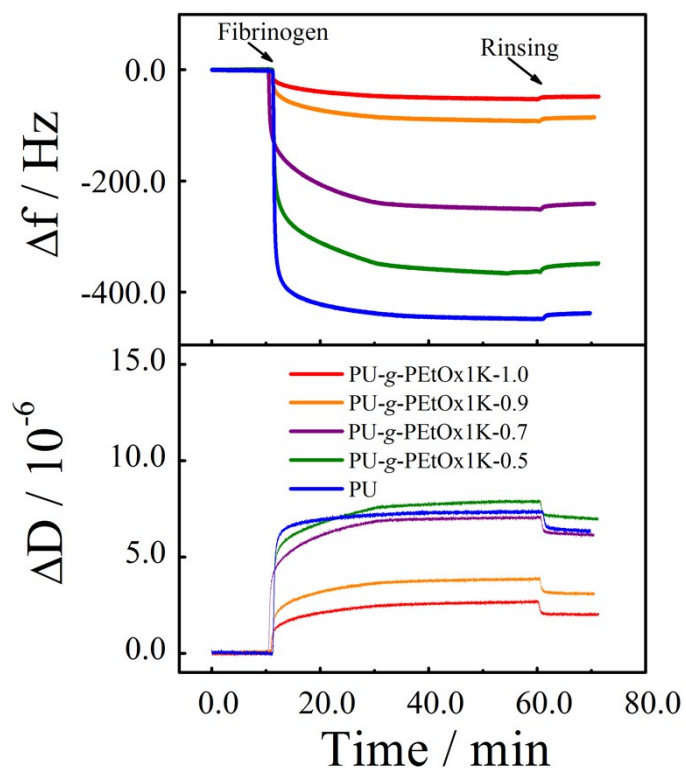

Figure S7. Time dependence of frequency shift ( $\Delta f$ ) and dissipation shift ( $\Delta D$ ) for the adsorption of fibrinogen on PU-g-PEtOx1K surfaces with various graft densities of PEtOx(OH)<sub>2</sub>-1K at 25 °C.

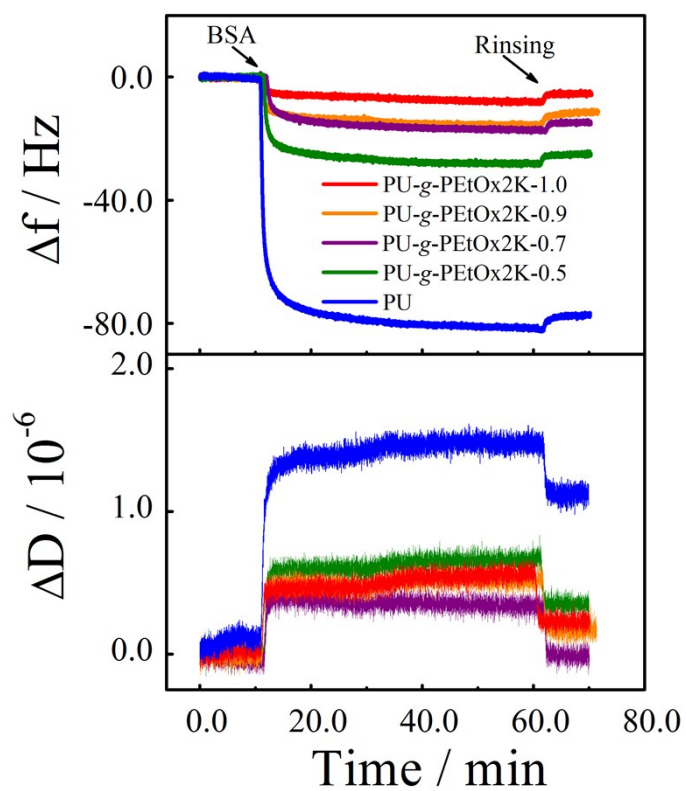

Figure S8. Time dependence of frequency shift ( $\Delta f$ ) and dissipation shift ( $\Delta D$ ) for the adsorption of BSA on PU-g-PEtOx2K surfaces with various graft densities of PEtOx(OH)<sub>2</sub>-2K at 25 °C.



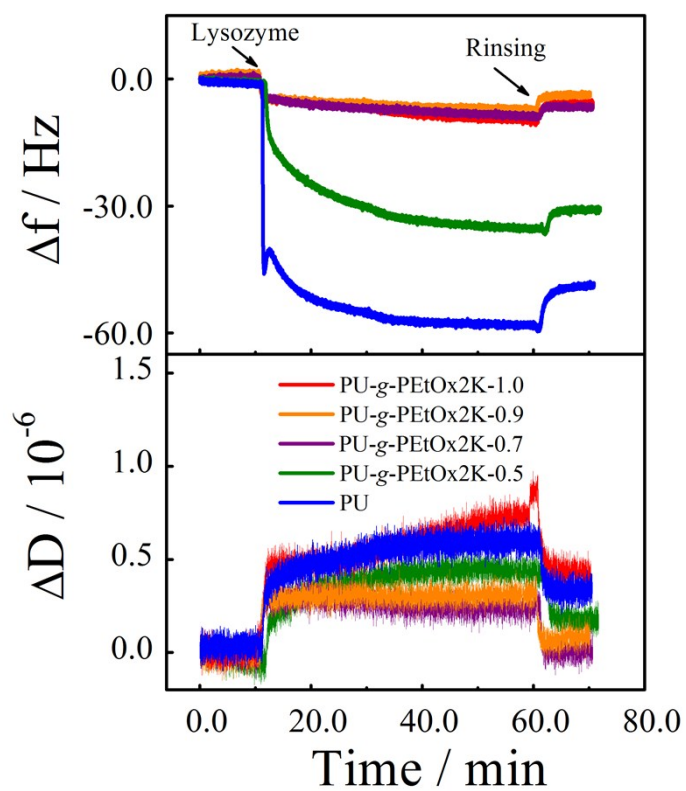

Figure S9. Time dependence of frequency shift ( $\Delta f$ ) and dissipation shift ( $\Delta D$ ) for the adsorption of lysozyme on PU-g-PEtOx2K surfaces with various graft densities of PEtOx(OH)<sub>2</sub>-2K at 25 °C.

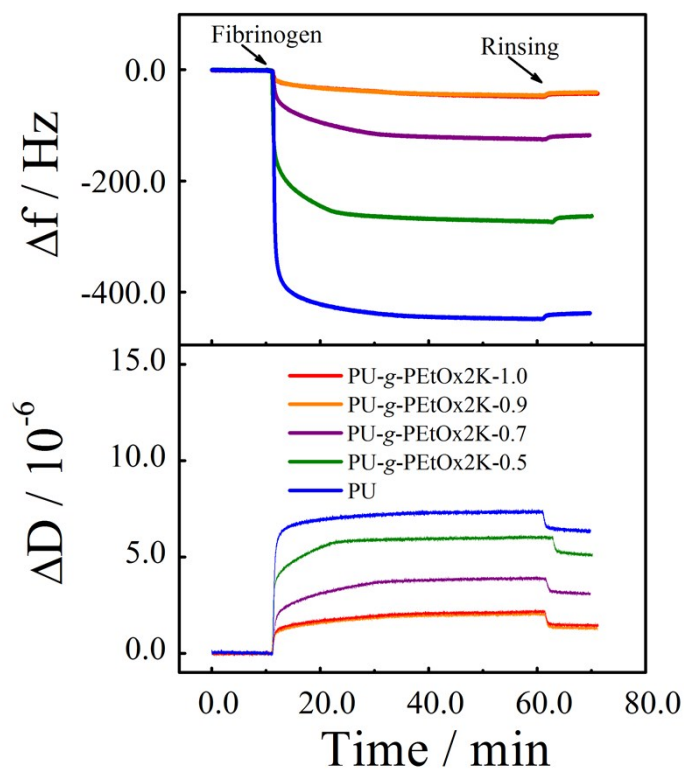

Figure S10. Time dependence of frequency shift ( $\Delta f$ ) and dissipation shift ( $\Delta D$ ) for the adsorption of fibrinogen on PU-g-PEtOx2K surfaces with various graft densities of PEtOx(OH)<sub>2</sub>-2K at 25 °C.

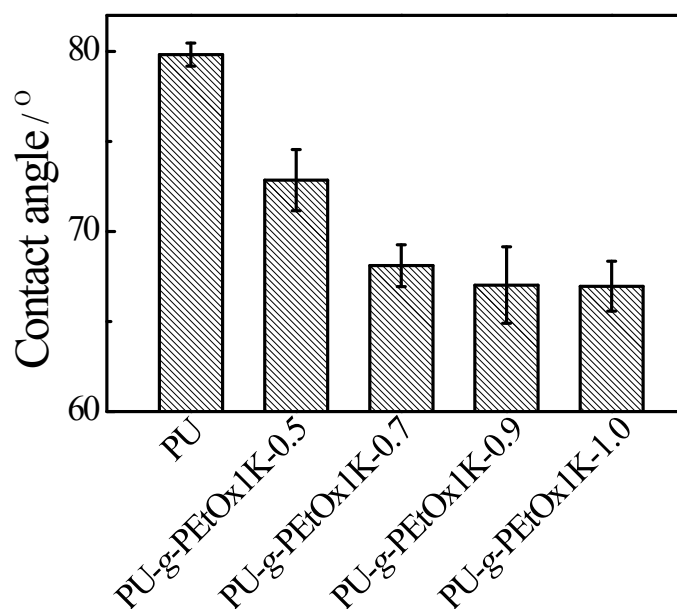

Figure S11. Stationary water contact angle of PU and PU-g-PEtOx1K with various graft densities where the PEtOx(OH)<sub>2</sub>-1K was employed.

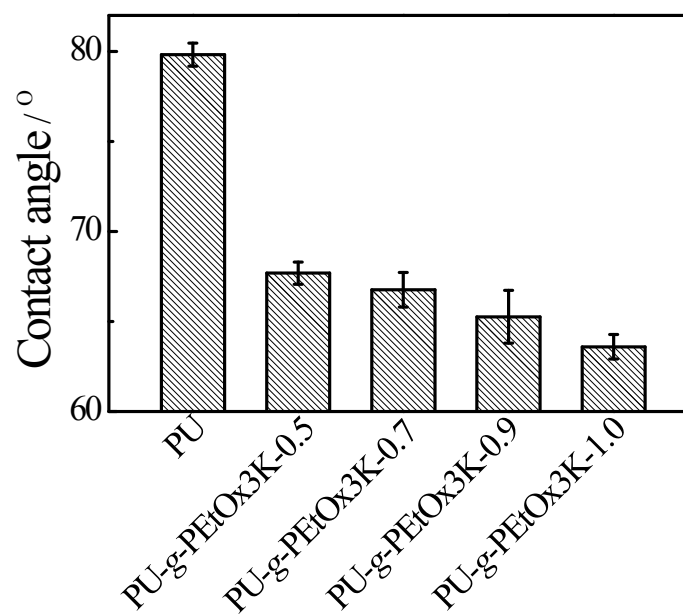

Figure S12. Stationary water contact angle of PU and PU-g-PEtOx3K with various graft densities where the PEtOx(OH)<sub>2</sub>-3K was employed.
